# Supplementary material
Source: Springer Nature journal article supplement (https://www.springermedizin.de/resource/supplementary/12888_2012_1229_MOESM1_ESM.pdf/9480674)
Supplement: MOESM1 [file 9480674]

| English version                                                   | Bai J-Y(2007)           | DS14-Taiwan                                                        |
|-------------------------------------------------------------------|-------------------------|--------------------------------------------------------------------|
| NA                                                                | $\alpha = .83$          | $\alpha = .86$                                                     |
| 2. I often make a fuss about unimportant things                   | 2. 我常常对不重要的事情小题大做       | 2. 我常為了小事情發牢騷                                                      |
| 4. I often feel unhappy                                           | 4. 我常常感到不愉快             | 4. 我常感到不快樂                                                         |
| 5. I am often irritated                                           | 5. 我常常容易被惹怒，发脾气         | 5. 我常感到煩躁                                                          |
| 7. I take a gloomy view of things                                 | 7. 我对事情的看法很悲观           | 7. 我用悲觀的角度看事情                                                      |
| 9. I am often in a bad mood                                       | 9. 我的心情常常很差             | 9. 我常心情不好                                                          |
| 12. I often find myself worrying about something                  | 12. 我觉得自己经常为一些事情担忧      | 12. 我常覺得自己在擔心一些事情                                                  |
| 13. I am often down in the dumps                                  | 13. 我经常闷闷不乐             | 13. 我的心情常跌到谷底                                                      |
| SI                                                                | $\alpha = .72$          | $\alpha = .79$                                                     |
| 1. I make contact easily when I meet people                       | 1. 我很容易与人交往             | 1. 遇到人時，我很容易與人交談                                                   |
| 3. I often talk to strangers                                      | 3. 我常常与陌生人交谈            | 3. 我不喜歡跟很多人在一起<br>(I don't like to have a lot of people around me) |
| 6. I often feel inhibited in social interactions                  | 6. 在社会交往中我常常感到拘谨和放不开    | 6. 與人互動我常覺得不自在                                                     |
| 8. I find it hard to start a conversation                         | 8. 我觉得与别人交谈时很难打开话题      | 8. 我很難主動開口與人交談                                                     |
| 10. I am a closed kind of person                                  | 10. 我是一个封闭型的人           | 10. 我是個封閉的人                                                        |
| 11. I would rather keep other people at a distance                | 11. 我宁愿与其他人保持一定距离       | 11. 我寧願與其他保持距離                                                     |
| 14. When socializing, I don't find the right things to talk about | 14. 在社会交往中，我找不到合适的话题来谈论 | 14. 與人互動時我不知道該說些什麼才好                                               |
